# Supplementary material for: A carbazole functionalized semiconducting compound as a heavy atom free photosensitizer for phototherapy against lung cancer
Source: Royal Society of Chemistry journal article supplement (doi:10.1039/d0tb02314k), 2020-01-01
Supplement: d0tb02314k1.pdf [file d0tb02314k1.pdf]

## Carbazole functionalized semiconducting compound as heavy atom free photosensitizer for phototherapy against lung cancer

Jun Deng<sup>ab</sup>, Ning Zhong<sup>b</sup>, Xiaochuan Zhang<sup>b</sup>, Chang Li<sup>a</sup>, Chun Xu<sup>a</sup>, Jun Zhao<sup>a\*</sup>

*a. Department of thoracic surgery, the First Hospital Affiliated to Soochow University, Soochow University, 215301, P.R. China. Email: [zhaojia0327@126.com](mailto:zhaojia0327@126.com).*

*b. Department of thoracic surgery, Kunshan Hospital Affiliated to Jiangsu University, Kunshan, 215300, P.R. China.*

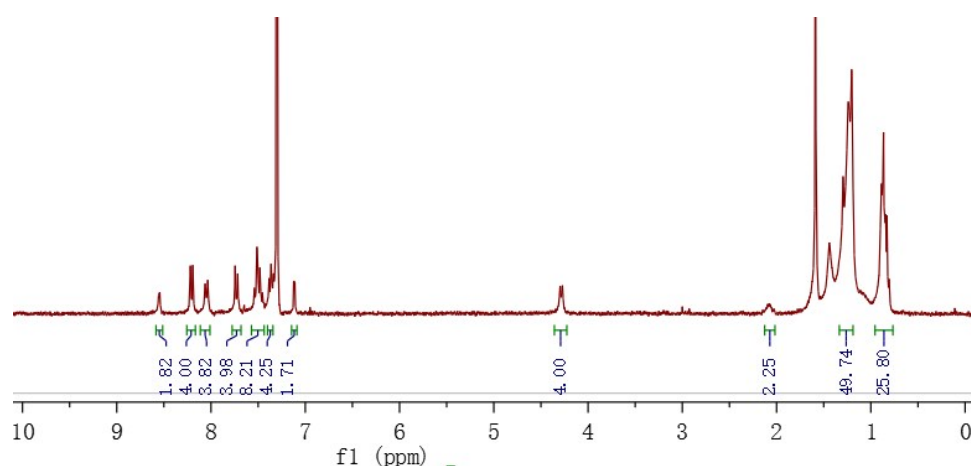

Fig. S1 <sup>1</sup>H NMR of DPPCz in CDCl<sub>3</sub>.

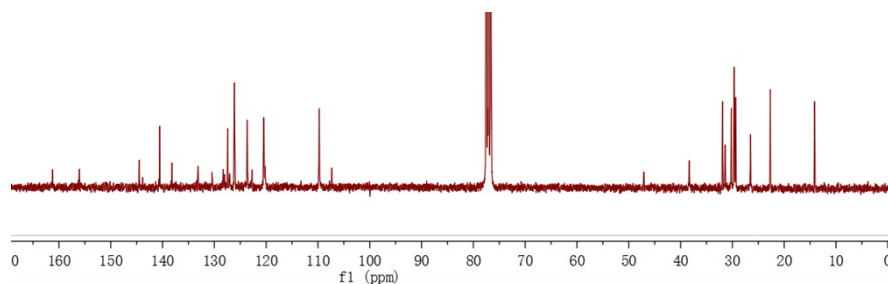

Fig. S2 <sup>13</sup>C NMR of DPPCz in CDCl<sub>3</sub>.

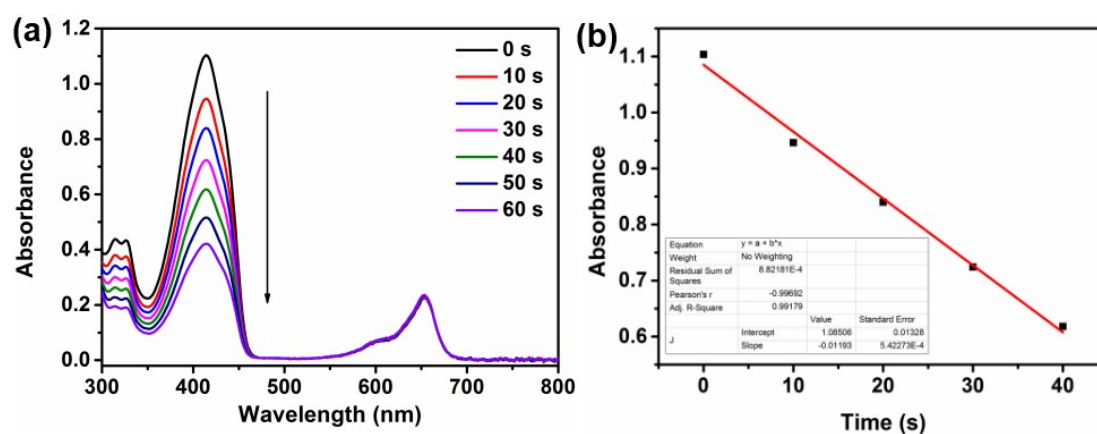

Fig. S3 (a) Degradation of DPBF in the presence of MB with irradiation; (b) Linear fitting of the absorbance of DPBF at 414 nm.

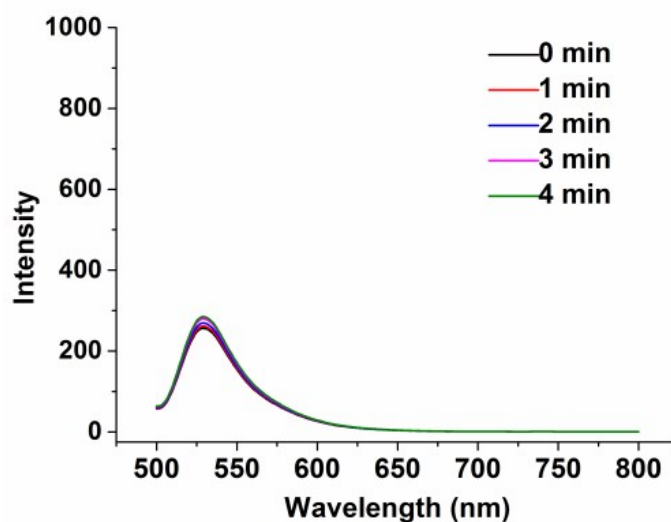

Fig. S4 Fluorescence intensity of SOSG in the absence of **DPPCz** NPs.

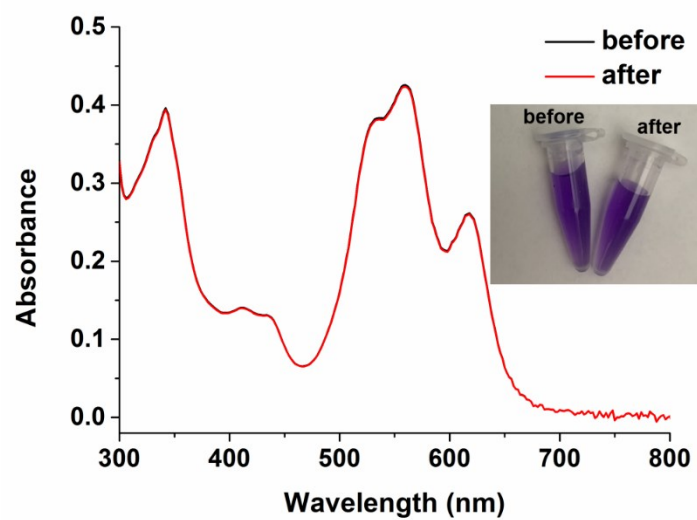

Fig. S5 Absorbance spectra of DPPCz NPs before and after irradiation.

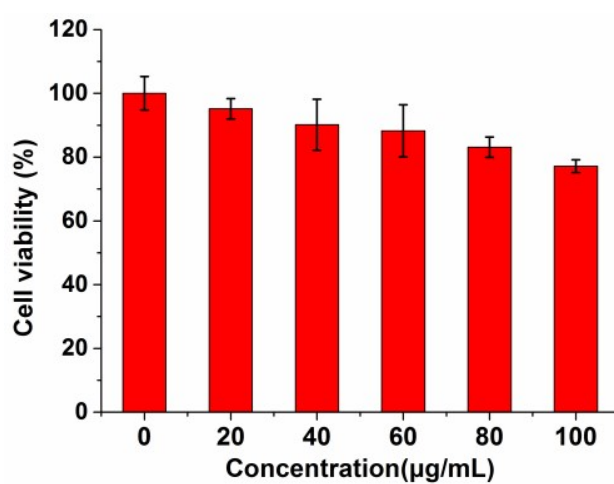

Fig. S6 Cell viability of A549 incubated with **DPPCz** NPs (0, 20, 40, 60, 80 and 100 µg/mL).

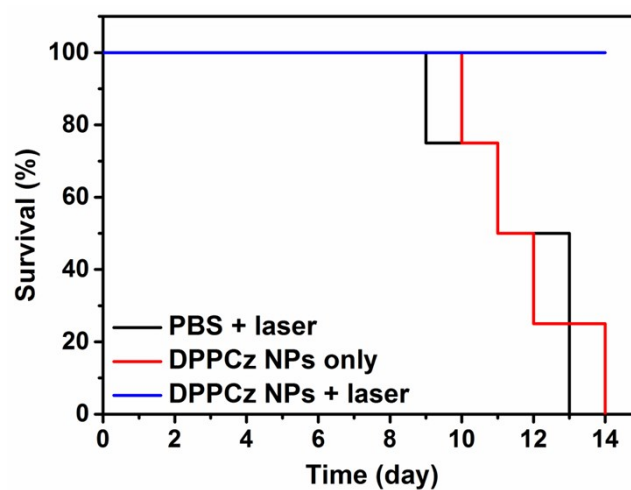

Fig. S7 Survival rate of the nude mice treated with PBS + laser, **DPPCz** NPs only and **DPPCz** NPs + laser.
